# Supplementary material for: Efficiency and stability of narrow-gap semiconductor-based photoelectrodes
Source: Royal Society of Chemistry journal article supplement (doi:10.1039/c9ee00524b), 2019-01-01
Supplement: c9ee00524b1.pdf [file c9ee00524b1.pdf]

## Supplementary Information

### Efficiency and Stability of Narrow-Gap Semiconductor-Based

#### Photoelectrodes

Jianyun Zheng,<sup>†ab</sup> Huaijuan Zhou,<sup>†c</sup> Yuqin Zou,<sup>\*a</sup> Ruilun Wang,<sup>a</sup> Yanhong Lyu,<sup>\*a</sup> San Ping Jiang<sup>\*b</sup> and Shuangyin Wang<sup>\*a</sup>

a. State Key Laboratory of Chem/Bio-Sensing and Chemometrics College of Chemistry and Chemical Engineering, Hunan University, Changsha 410082, Hunan, China;

b. Western Australian School of Mines: Minerals, Energy and Chemical Engineering and Fuels and Energy Technology Institute, Curtin University, Perth, Western Australia 6102, Australia;

c. Centre for Translational Bone, Joint and Soft Tissue Research, University Hospital and Faculty of Medicine Carl Gustav Carus, Technische Universität Dresden, Fetscherstraße 74, Dresden 01307, Germany.

Table S1. Reported photoelectrochemical (PEC) performances of the photocathodes by surface modification, and their detailed working conditions. The photocurrent at 0 V vs RHE is simplified as  $J_{ph,ca}$  ( $\text{mA cm}^{-2}$ ), the operation time Stability (h), the initial photocurrent during stability measurements  $J_{in}$  ( $\text{mA cm}^{-2}$ ), and the degradation rate  $J_{de}/J_{in}$  (%). The Remark grid is used to illustrate the testing light source and the potentials during stability measurements.

| Year | Light absorber                      | Treatment method                     | pH  | $J_{ph,ca}$ | Stability | $J_{in}$ | $J_{de}/J_{in}$ | Remark                                       | Ref. |
|------|-------------------------------------|--------------------------------------|-----|-------------|-----------|----------|-----------------|----------------------------------------------|------|
| 2018 | p-InP                               | Repeated surface oxidation/reduction | 0   | -24         |           |          |                 | 500 W Hg/Xe lamp                             | 82   |
| 2018 | $\text{Cu(In, Ga)(S, Se)}_2$        | Different S, Ga composition          | 0.6 | -6          | 1         | -18      | 80              | 100 mW $\text{cm}^{-2}$ ,<br>-0.2 V vs RHE   | 101  |
| 2017 | SnS                                 | Fast annealing                       | 1   | -0.7        | 3         | -7       | 41              | 100 mW $\text{cm}^{-2}$ ,<br>-0.3 V vs RHE   | 107  |
| 2018 | p-Si                                | Nanowire                             | 0   | 0           | 1         | -52      | 2               | 100 mW $\text{cm}^{-2}$ ,<br>-0.75 V vs RHE  | 108  |
| 2017 | $\text{Cu}_2\text{O}$               | High-index facet                     | 7   | -0.75       | 0.25      | -0.75    | 40              | 100 mW $\text{cm}^{-2}$ ,<br>0 V vs RHE      | 109  |
| 2018 | $\text{CuIn(S}_{1-x}\text{Se}_x)_2$ | Different S, Se composition          | 14  | -1.2        | 12        | -0.5     | 10              | 100 mW $\text{cm}^{-2}$ ,<br>NA              | 110  |
| 2017 | p-Si                                | Micro-pillar array                   | 0   | -15         | 0.058     | -18.5    | 0               | 100 mW $\text{cm}^{-2}$ ,<br>-0.07 V vs RHE  | 111  |
| 2018 | $\text{WSe}_2$                      | Intraflake and edge defects          | 0   | -1.63       | 0.129     | -1.63    | 0               | 100 mW $\text{cm}^{-2}$ ,<br>0 V vs RHE      | 112  |
| 2018 | $\text{Cu}_2\text{O}$               | Eu doping                            | 4.9 | -3.2        |           |          |                 | 35 mW $\text{cm}^{-2}$                       | 113  |
| 2018 | $\text{Sb}_2\text{Se}_3$            | Compositing Graphene                 | 3   | -0.65       | 0.167     | -0.65    | 94              | 100 mW $\text{cm}^{-2}$ ,<br>0 V vs RHE      | 114  |
| 2018 | $\text{Cu}_2\text{O}$               | Nanowires                            | 7   | -5.45       |           |          |                 | 100 mW $\text{cm}^{-2}$                      | 115  |
| 2018 | CuGaSe                              | Different Cu, Ga composition         | 0   | -2          | 408       | -12      | 0               | 100 mW $\text{cm}^{-2}$ ,<br>-1 V vs RHE     | 116  |
| 2018 | p-CuInS                             | Different Cu composition             | 3   | -0.05       | 0.05      | -0.015   | 0               | 100 mW $\text{cm}^{-2}$ ,<br>no applied bias | 117  |
| 2018 | $\text{CuGa(S,Se)}_2$               | Different Cu composition             | 13  | -0.8        |           |          |                 | 100 mW $\text{cm}^{-2}$                      | 118  |
| 2019 | $\text{ReS}_2$                      | Different phase interface            | 7   | 0           | 12        | -10      | 0               | 100 mW $\text{cm}^{-2}$ ,<br>-0.25 V vs RHE  | 119  |
| 2019 | $\text{WSe}_2$                      | Surface oxidation                    | 4.3 | -10.6       |           |          |                 | 100 mW $\text{cm}^{-2}$                      | 120  |

Table S2. Reported photoelectrochemical (PEC) performances of the photoanodes by surface modification, and their detailed working conditions. The photocurrent at 1.23 V vs RHE is simplified as  $J_{ph,an}$  ( $\text{mA cm}^{-2}$ ), the operation time Stability (h), the initial photocurrent during stability measurements  $J_{in}$  ( $\text{mA cm}^{-2}$ ), and the degradation rate  $J_{de}/J_{in}$  (%). The Remark grid is used to illustrate the testing light source and the potentials during stability measurements.

| Year | Light absorber                               | Treatment method                  | pH | $J_{ph,an}$ | Stability | $J_{in}$ | $J_{de}/J_{in}$ | Remark                                                    | Ref. |
|------|----------------------------------------------|-----------------------------------|----|-------------|-----------|----------|-----------------|-----------------------------------------------------------|------|
| 2018 | n-Si                                         | Porous, nanowire                  | 8  | 1.1         | 0.33      | 1.1      | 32              | 100 $\text{mW cm}^{-2}$ ,<br>1.23 V vs RHE                | 102  |
| 2018 | CdS                                          | Gradient oxygen doping            | 11 | 6           | 42        | 6        | 0               | 100 $\text{mW cm}^{-2}$ ,<br>0.4 V vs RHE                 | 105  |
| 2018 | n-CuInS                                      | Different Cu composition          | 3  | 0.61        | 0.05      | 0.015    | 0               | 100 $\text{mW cm}^{-2}$ ,<br>no applied bias              | 117  |
| 2016 | $\text{Zn}_{1.7}\text{Si}_{0.3}\text{GeO}_4$ | Substitution of Si atom           | 7  | 0.006       | 0.153     | 0.006    | 0               | 300 W Xe lamp<br>1.6 V vs SCE                             | 122  |
| 2018 | $\text{Ag}_2\text{ZnSnS}_4$                  | Different Ag, Zn composition      | 7  | 0.31        | 0.278     | 0.44     | 0               | 100 $\text{mW cm}^{-2}$ ,<br>1 V vs RHE                   | 123  |
| 2017 | CdS                                          | Surface oxidation                 | 7  | 0.2         | 1.333     | 0.15     | 33              | 5 $\text{mW cm}^{-2}$ ,<br>470 nm light,<br>0.99 V vs RHE | 124  |
| 2019 | InGaN                                        | $\text{H}_3\text{PO}_4$ treatment | 0  | 18          |           |          |                 | 100 $\text{mW cm}^{-2}$                                   | 125  |

Table S3. Reported photoelectrochemical (PEC) performances of the photocathodes with conductor/semiconductor structure, and their detailed working conditions. The photocurrent at 0 V vs RHE is simplified as  $J_{ph,ca}$  ( $\text{mA cm}^{-2}$ ), the operation time Stability (h), the initial photocurrent during stability measurements  $J_{in}$  ( $\text{mA cm}^{-2}$ ), and the degradation rate  $J_{de}/J_{in}$  (%). The Remark grid is used to illustrate the testing light source and the potentials during stability measurements.

| Year | Light absorber                  | Surface materials                          | pH  | $J_{ph,ca}$ | Stability | $J_{in}$ | $J_{de}/J_{in}$ | Remark                                                      | Ref. |                |
|------|---------------------------------|--------------------------------------------|-----|-------------|-----------|----------|-----------------|-------------------------------------------------------------|------|----------------|
| 2016 | Si nanowire                     | Au <sub>3</sub> Cu nanoparticle            | 6.8 | -0.95       | 18        | -4.8     | 33              | 20 mW cm <sup>-2</sup> ,<br>740 nm light,<br>-0.26 V vs RHE | 23   |                |
| 2017 | p-Si                            | Pt<br>CoP                                  | 7   | -7<br>-5.5  |           |          |                 | 100 mW cm <sup>-2</sup>                                     | 98   |                |
| 2017 | p-Si                            | Stoichiometric<br>MoS <sub>2</sub>         | 0.3 | -22.2       | 24        | -31      | 6               | 100 mW cm <sup>-2</sup> ,<br>-0.29 V vs RHE                 | 126  |                |
| 2018 | p-Si nanowire                   | Co <sub>2</sub> P                          | 0.3 | -21.9       | 20        | -18.4    | 3               | 100 mW cm <sup>-2</sup> ,<br>0 V vs RHE                     | 127  |                |
| 2014 | p-Si                            | 1T-MoS <sub>2</sub>                        | 0.3 | -17.6       | 3         | -17.6    | 23              | 100 mW cm <sup>-2</sup> ,<br>0 V vs RHE                     | 128  |                |
| 2018 | Si                              | Carbon nanosheet                           | 0   | -13         | 1         | -13      | 79              | 100 mW cm <sup>-2</sup> ,<br>0 V vs RHE                     | 129  |                |
| 2012 | p-Si nanowire                   | Pt nanoparticle                            | 1   | -28.2       |           |          | 0               | 100 mW cm <sup>-2</sup>                                     | 130  |                |
| 2018 | Cu <sub>2</sub> O               | Reduced graphene<br>oxide                  | 6.5 | -2.4        | 0.278     | -2.4     | 23              | 85 mW cm <sup>-2</sup> ,<br>0 V vs RHE                      | 131  |                |
| 2015 | p-Si                            | Marcasite-type<br>CoSe <sub>2</sub>        | 0   | -9          | 0.833     | -9       | 0               | 100 mW cm <sup>-2</sup> ,<br>0 V vs RHE                     | 132  |                |
| 2017 | p-Si wire                       | NiMoZn particle                            | 0   | -1.45       | 3.5       | -1.45    | 4               | 100 mW cm <sup>-2</sup> ,<br>0 V vs RHE                     | 133  |                |
| 2018 | p-Si micropyramid               | WS <sub>2-x</sub> P <sub>x</sub> nanosheet | 0   | -19.11      | 8         | -19.11   | 14              | 110 mW cm <sup>-2</sup> ,<br>0 V vs RHE                     | 134  |                |
| 2013 | p-WSe <sub>2</sub>              | Pt-Ru                                      | 4.2 | > -24       | 2         | -15.5    | 3               | 100 mW cm <sup>-2</sup> ,                                   | 135  |                |
|      |                                 |                                            | 2   |             |           |          |                 |                                                             |      | -0.65 V vs SCE |
|      |                                 |                                            | 10  |             |           |          |                 |                                                             |      |                |
| 2018 | 3D structured p-Si              | Co-P nanoparticle                          | 0   | -24.8       | 30        | -24.8    | 20              | 100 mW cm <sup>-2</sup> ,<br>0 V vs RHE                     | 136  |                |
| 1982 | p-Si                            | Pt(0)                                      | 4   | -3.25       | 0.5       | -3.25    | 25              | 100 mW cm <sup>-2</sup> ,<br>0 V vs RHE                     | 137  |                |
| 2017 | p-Si                            | Nanoporous Au<br>thin film                 | 8.5 | -1.25       | 4.5       | 1.8      | 20              | 100 mW cm <sup>-2</sup> ,<br>-0.59 V vs RHE                 | 138  |                |
| 2015 | Si nanowire                     | N-doped graphene<br>quantum                | 0   | -34         |           |          |                 | 100 mW cm <sup>-2</sup>                                     | 139  |                |
| 2018 | p-Si                            | Ni(TEOA) <sub>2</sub> Cl <sub>2</sub>      | 0.3 | -5.57       | 24        | -26      | 4               | 100 mW cm <sup>-2</sup> ,<br>not shown                      | 140  |                |
| 2018 | Si nanowire                     | Ultrathin MoS <sub>2</sub><br>layer        | 0.5 | -16.5       | 48        | -15      | 7               | 100 mW cm <sup>-2</sup> ,<br>0 V vs RHE                     | 141  |                |
| 2017 | Sb <sub>2</sub> Se <sub>3</sub> | MoS <sub>x</sub> -S                        | 0   | -16         | 20        | -16      | 100             | 100 mW cm <sup>-2</sup> ,                                   | 142  |                |
|      |                                 | MoS <sub>x</sub>                           | 0   | -5          | 20        | -5       | 28              | 0 V vs RHE                                                  |      |                |

|      |                                      |                             |     |                        |        |       |      |                                                         |     |
|------|--------------------------------------|-----------------------------|-----|------------------------|--------|-------|------|---------------------------------------------------------|-----|
| 2018 | Black n <sup>+</sup> p-Si            | Pd nanoparticle             | 0   | -13.8                  |        |       |      | 100 mW cm <sup>-2</sup>                                 | 143 |
| 2018 | Cu <sub>2</sub> O                    | Oligoaniline layer          | 5.5 | -0.8                   | 2      | -0.7  | 72   | 100 mW cm <sup>-2</sup> ,<br>0.1 V vs RHE               | 144 |
| 2018 | CuGaS <sub>2</sub>                   | Au nanoparticle             | 7   | -1.5                   | 0.0625 | -2    | 37   | 300 W Xe lamp,<br>0 V vs RHE                            | 145 |
| 2018 | Cu <sub>2</sub> O                    | Thin MoS <sub>2</sub> layer | 6.7 | -3.5                   | 0.167  | -3    | 7    | 100 mW cm <sup>-2</sup> ,<br>0 V vs RHE                 | 146 |
| 2017 | Macroporous p-Si                     | H-Co <sub>0.85</sub> Se P   | 7   | -1                     | 2      | -8    | 6    | 100 mW cm <sup>-2</sup> ,<br>-0.6 V vs RHE              | 147 |
| 2018 | Cu <sub>2</sub> O nanowire           | Ag                          | 7.4 | -0.24                  | 0.056  | -0.24 | 0    | Xe lamp<br>0 V vs RHE                                   | 148 |
| 2016 | p-Si<br>p-InP<br>p-GaP               | 2H-MoS <sub>2</sub> layer   | 1.1 | -24.6<br>-6.8<br>-2.25 | 0.583  | -40   | 0    | 100 mW cm <sup>-2</sup> ,<br>from 0.4 to -1<br>V vs RHE | 149 |
| 2015 | n <sup>+</sup> -p-p <sup>+</sup> -Si | CoPS                        | 0   | -35                    |        |       |      | 100 mW cm <sup>-2</sup>                                 | 150 |
| 2019 | p-Si                                 | Metallic Bi                 | 7.4 | 0                      | 7      | -4    | 12.5 | 50 mW cm <sup>-2</sup> ,<br>-0.32 V vs RHE              | 151 |
| 2019 | p-Si                                 | ReS <sub>2</sub> nanosheets | 0   | -18.5                  |        |       |      | 100 mW cm <sup>-2</sup>                                 | 152 |
| 2019 | Black Si                             | Pt                          | 0.7 | -19.5                  | 90     | -23   | 28   | 100 mW cm <sup>-2</sup> ,<br>no applied bias            | 153 |

Table S4. Reported photoelectrochemical (PEC) performances of the photoanodes with conductor/semiconductor structure, and their detailed working conditions. The photocurrent at 1.23 V vs RHE is simplified as  $J_{ph,an}$  ( $\text{mA cm}^{-2}$ ), the operation time Stability (h), the initial photocurrent during stability measurements  $J_{in}$  ( $\text{mA cm}^{-2}$ ), and the degradation rate  $J_{de}/J_{in}$  (%). The Remark grid is used to illustrate the testing light source and the potentials during stability measurements.

| Year | Light absorber      | Surface materials     | pH   | $J_{ph,an}$ | Stability | $J_{in}$ | $J_{de}/J_{in}$ | Remark                                       | Ref. |
|------|---------------------|-----------------------|------|-------------|-----------|----------|-----------------|----------------------------------------------|------|
| 2018 | p <sup>+</sup> n-Si | MoSe <sub>2</sub>     | 0    | 30          | 14        | 2        | 15              | 100 mW cm <sup>-2</sup> ,<br>0.38 V vs RHE   | 154  |
| 2018 | CdS nanowire        | 1T-MoS <sub>2</sub>   | 7    | 16.8        |           |          |                 | 300 W Xe lamp                                | 155  |
| 2018 | Nanostructured CdS  | PANI-PPY              | 6    | 0.77        | 8         | 0.77     | 9               | 80 mW cm <sup>-2</sup> ,<br>1.23 V vs RHE    | 156  |
| 2017 | n-Si                | Thin Ni layer         | 9.5  | 31          |           |          |                 | 100 mW cm <sup>-2</sup>                      | 157  |
| 2013 | n-Si                | Single layer graphene | 7.6  | 5.5         | >0.278    | 11       | 0               | 100 mW cm <sup>-2</sup> ,<br>0 V vs solution | 158  |
| 2013 | n-Si nanowire       | PEDOT layer           | 13.6 | 3           |           |          |                 | 100 mW cm <sup>-2</sup>                      | 159  |
| 2016 | n-Si                | PEDOT:PSS             | 0    | 28.8        | 17        | 10       | 8               | 100 mW cm <sup>-2</sup> ,<br>0.3 V vs RHE    | 160  |
| 2016 | Porous CdS          | Nafion molecule       | 12   | 7.2         | 1.39      | 5.68     | 8               | 100 mW cm <sup>-2</sup> ,<br>0 V vs RHE      | 161  |
| 2018 | 3D CdS              | Au                    | 7    | 1.04        | 2.78      | 1.04     | 23              | 100 mW cm <sup>-2</sup> ,<br>not shown       | 162  |
| 2019 | SnS <sub>2</sub>    | Pt                    | 7    | 0.112       | 0.55      | 0.112    | 40              | 100 mW cm <sup>-2</sup> ,<br>1.23 V vs RHE   | 163  |

Table S5. Reported photoelectrochemical (PEC) performances of the photocathodes with semiconductor (insulator)/semiconductor structure, and their detailed working conditions. The photocurrent at 0 V vs RHE is simplified as  $J_{ph,ca}$  ( $\text{mA cm}^{-2}$ ), the operation time Stability (h), the initial photocurrent during stability measurements  $J_{in}$  ( $\text{mA cm}^{-2}$ ), and the degradation rate  $J_{de}/J_{in}$  (%). The Remark grid is used to illustrate the testing light source and the potentials during stability measurements.

| Year | Light absorber                 | Surface materials                       | pH   | $J_{ph,ca}$ | Stability | $J_{in}$ | $J_{de}/J_{in}$ | Remark                                                                               | Ref. |
|------|--------------------------------|-----------------------------------------|------|-------------|-----------|----------|-----------------|--------------------------------------------------------------------------------------|------|
| 2011 | p-Si pillar                    | $\text{Mo}_3\text{S}_4$                 | 0    | -9.5        | 24        | -2.15    | 5               | 100 $\text{mW cm}^{-2}$ ,<br>0 V vs RHE<br>620 nm light,<br>28.3 $\text{mW cm}^{-2}$ | 39   |
| 2017 | $\text{Cu}_2\text{O}$ nanowire | C                                       | 7    | -1.5        | 0.167     | -1.5     | 0               | 100 $\text{mW cm}^{-2}$ ,<br>no applied bias                                         | 164  |
| 2016 | a-Si:H/a-SiGe:H                | Hydrogen doped<br>$\text{TiO}_2$ layer  | 13.6 | -5.51       | 5         | -6       | 8               | 100 $\text{mW cm}^{-2}$ ,<br>0 V vs RHE                                              | 165  |
| 2017 | p-Si micropillar               | $\alpha\text{-Fe}_2\text{O}_3$ layer    | 7    | -0.36       | 0.011     | -0.2     | 5               | 100 $\text{mW cm}^{-2}$ ,<br>-0.52 V vs SCE                                          | 166  |
| 2018 | $\text{Cu}_2\text{O}$ nanowire | $\text{TiO}_2\text{-Cu}^+$              | 6.8  | -2.3        | 0.5       | -0.47    | 72              | 100 $\text{mW cm}^{-2}$ ,<br>0.3 V vs RHE                                            | 167  |
| 2016 | $\text{Cu}_2\text{O}$          | NiFe-LDH                                | 7    | -2.42       | 40        | -0.45    | 5               | 100 $\text{mW cm}^{-2}$ ,<br>-0.2 V vs Ag/AgCl                                       | 168  |
| 2017 | Zn: $\text{Cu}_2\text{O}$      | $\text{Cu}_2\text{O}$                   | 4.25 | -2          |           |          |                 | 100 $\text{mW cm}^{-2}$                                                              | 169  |
| 2017 | $\text{Cu}_2\text{O}$ nanowire | ZnO nanoparticle                        | 7    | -3.4        |           |          |                 | 100 $\text{mW cm}^{-2}$                                                              | 170  |
| 2017 | $\text{Cu}_2\text{O}$          | NiFeSP                                  | 13.7 | -12.1       |           |          |                 | 100 $\text{mW cm}^{-2}$                                                              | 171  |
| 2018 | p-Si                           | $\text{ReS}_2$                          | 0    | -9          | 3         | -9       | 0               | 100 $\text{mW cm}^{-2}$ ,<br>0 V vs RHE                                              | 172  |
| 2014 | p-Si nanowire                  | $\text{Ni}_{12}\text{P}_5$ nanoparticle | 0    | -21         | 1         | -13      | 3               | 100 $\text{mW cm}^{-2}$ ,<br>0.2 V vs RHE                                            | 173  |
| 2013 | p-GaP                          | Cobaloxime                              | 7    | -2.7        | 0.083     | -1.3     | 17              | 100 $\text{mW cm}^{-2}$ ,<br>0.17 V vs RHE                                           | 174  |
| 2017 | p-Si                           | GaN nanowire                            | 14   | -0          | 5         | -40      | 30              | 100 $\text{mW cm}^{-2}$ ,<br>not shown                                               | 175  |
| 2017 | n <sup>+</sup> p-GaAs          | $\text{SrTiO}_3$ layer                  | 7    | -6          | 24        | -6       | 10              | 100 $\text{mW cm}^{-2}$ ,<br>0 V vs RHE                                              | 176  |
| 2017 | $\text{Cu}_2\text{O}$          | $\text{RuO}_x$                          | 5    | -0.8        |           |          |                 | 100 $\text{mW cm}^{-2}$                                                              | 177  |
| 2018 | $\text{Cu}_2\text{O}$          | CuO                                     | 6    | -0.3        | 21        | -0.3     | 77              | 300 W Xe lamp,<br>> 420 nm light<br>0 V vs RHE                                       | 178  |
| 2018 | $\text{Cu}_2\text{O}$ nanowire | $\text{Cu}_2\text{S}$ layer             | 4.9  | -5.05       | 5         | -5.05    | 50              | 100 $\text{mW cm}^{-2}$ ,<br>0 V vs RHE                                              | 179  |
| 2017 | Nanoporous Si                  | $\text{HfO}_2$                          | 0    | 0           | 12        | -12.5    | 11              | 100 $\text{mW cm}^{-2}$ ,<br>-0.8 V vs Ag/AgCl                                       | 180  |
| 2016 | p-Si                           | $\text{Al}_2\text{O}_3$                 | 0    | 0           | 20        | -25      | 0               | 100 $\text{mW cm}^{-2}$ ,<br>-0.55 V vs RHE                                          | 181  |
| 2019 | $\text{Cu}_2\text{O}$          | $\text{Cd(OH)}_2$                       | 4.9  | -6.9        | 0.44      | -6.9     | 45              | 100 $\text{mW cm}^{-2}$ ,<br>0.4 V vs RHE                                            | 182  |

Table S6. Reported photoelectrochemical (PEC) performances of the photoanodes with semiconductor (insulator)/semiconductor structure, and their detailed working conditions. The photocurrent at 1.23 V vs RHE is simplified as  $J_{ph,an}$  ( $\text{mA cm}^{-2}$ ), the operation time Stability (h), the initial photocurrent during stability measurements  $J_{in}$  ( $\text{mA cm}^{-2}$ ), and the degradation rate  $J_{de}/J_{in}$  (%). The Remark grid is used to illustrate the testing light source and the potentials during stability measurements.

| Year | Light absorber                                                       | Surface materials                                  | pH   | $J_{ph,an}$ | Stability | $J_{in}$ | $J_{de}/J_{in}$ | Remark                                       | Ref. |
|------|----------------------------------------------------------------------|----------------------------------------------------|------|-------------|-----------|----------|-----------------|----------------------------------------------|------|
| 2012 | n-Si                                                                 | NiO <sub>x</sub>                                   | 7.2  | 0.1         | 4         | 6.5      | 85              | 100 mW cm <sup>-2</sup> ,<br>not shown       | 73   |
| 2016 | n-Si                                                                 | CoO <sub>x</sub> thin layer                        | 13.6 | 20.88       | 2500      | 30.2     | 14              | 100 mW cm <sup>-2</sup> ,<br>1.63 V vs RHE   | 186  |
| 2018 | In <sub>2</sub> S <sub>3</sub> nanosheet                             | ZnO                                                | 5.97 | 0.351       | 0.111     | 0.287    | 70              | 100 mW cm <sup>-2</sup> ,<br>1.2 V vs RHE    | 187  |
| 2018 | n-Si                                                                 | TiO <sub>x</sub>                                   | 6    | 1.6         | 0.111     | 0.8      | 21              | 100 mW cm <sup>-2</sup> ,<br>0 V vs SCE      | 188  |
| 2018 | ZnS yolk                                                             | CdS multi-shell                                    | 12.9 | 4.8         |           |          |                 | 100 mW cm <sup>-2</sup>                      | 189  |
| 2018 | CdS nanorod                                                          | Cu <sub>2</sub> O nanoparticle                     | 12   | 4.7         | 2         | 4        | 7               | 100 mW cm <sup>-2</sup> ,<br>not shown       | 190  |
| 2018 | CdSe core                                                            | Pb <sub>x</sub> Cd <sub>1-x</sub> S gradient layer | 13   | 10.2        | 2         | 8        | 5               | 100 mW cm <sup>-2</sup> ,<br>0.2 V vs RHE    | 191  |
| 2012 | n-Si wire                                                            | Fe <sub>2</sub> O <sub>3</sub>                     | 13.8 | 17.27       |           |          |                 | 100 mW cm <sup>-2</sup>                      | 192  |
| 2018 | In <sub>2</sub> S <sub>3</sub> nanosheet                             | ZnO shell                                          | 7    | 0.6         | 0.111     | 0.48     | 0               | 100 mW cm <sup>-2</sup> ,<br>1.23 V vs RHE   | 193  |
| 2018 | CdS microbox                                                         | MoS <sub>2</sub>                                   | 7    |             | 0.083     | 0.25     | 10              | Not shown                                    | 194  |
| 2018 | g-C <sub>3</sub> N <sub>4</sub> nanosheet                            | Zn <sub>0.1</sub> Cd <sub>0.9</sub> S              | 7.4  | 0.04        | 0.111     | 12.2     | 0               | 150 mW cm <sup>-2</sup> ,<br>not shown       | 195  |
| 2013 | Nanotextured n-Si                                                    | NiRuO <sub>x</sub>                                 | 7.2  | 1.34        | 1.5       | 7        | 15              | 100 mW cm <sup>-2</sup> ,<br>2.25 V vs RHE   | 196  |
| 2018 | CdS nanorod                                                          | SnS <sub>x</sub> nanosheet                         | 7    | 1.59        | 0.5       | 1.59     | 50              | 100 mW cm <sup>-2</sup> ,<br>1.23 V vs RHE   | 197  |
| 2013 | n-Si                                                                 | MnO                                                | 13.6 | 5           | 0.5       | 22       | 16              | 100 mW cm <sup>-2</sup> ,<br>0 V vs solution | 198  |
| 2016 | Porous Si                                                            | TiO <sub>2</sub> layer                             | 13.6 | 0.03        | 1         | 0.35     | 0               | Solar simulator,<br>1 V vs SCE               | 199  |
| 2018 | Si nanowire                                                          | Cu <sub>2</sub> O nanocube                         | 13.6 | 2           |           |          |                 | 100 mW cm <sup>-2</sup>                      | 200  |
| 2018 | InGaN nanowire                                                       | IrO <sub>x</sub> nanoparticle                      | 0    | 11          | 0.5       | 8        | 100             | 100 mW cm <sup>-2</sup> ,<br>0.8 V vs RHE    | 201  |
| 2018 | Ag <sub>8</sub> SnS <sub>6</sub>                                     | ZnSe                                               | 7    | 4.4         | 0.833     | 5.5      | 0               | 100 mW cm <sup>-2</sup> ,<br>0 V vs RHE      | 202  |
| 2015 | p <sup>+</sup> n-Si                                                  | NiO <sub>x</sub>                                   | 13.6 | 30          | 1200      | 32       | 6               | 100 mW cm <sup>-2</sup> ,<br>1.73 V vs RHE   | 203  |
| 2018 | Cu <sub>2</sub> ZnSn(S <sub>1-x</sub> Se <sub>x</sub> ) <sub>4</sub> | ZnO nanoarray                                      | 10.9 | 2.5         |           |          |                 | 100 mW cm <sup>-2</sup>                      | 204  |
| 2018 | n-Si                                                                 | GeAs nanosheet                                     | 13   | 3.3         | 1         | 3        | 73              | 100 mW cm <sup>-2</sup> ,<br>0.9 V vs RHE    | 205  |
| 2018 | WS <sub>2</sub> nanosheet                                            | CdS quantum dot                                    | 7.4  | 0.024       | 0.078     | 0.012    | 4               | Not shown                                    | 206  |



|      |                                    |                        |      |      |      |     |    |                                              |     |
|------|------------------------------------|------------------------|------|------|------|-----|----|----------------------------------------------|-----|
| 2019 | Ag <sub>2</sub> ZnSnS <sub>4</sub> | TiO <sub>2</sub> layer | 12.8 | 2.75 | 1    | 2.5 | 40 | 100 mW cm <sup>-2</sup> ,<br>0.4 V vs RHE    | 207 |
| 2019 | Ta <sub>3</sub> N <sub>5</sub>     | NiFeO <sub>x</sub>     | 13   | 6.3  | 0.25 | 6.3 | 21 | 100 mW cm <sup>-2</sup> ,<br>no applied bias | 208 |

Table S7. Reported photoelectrochemical (PEC) performances of the photocathodes with conductor/semiconductor (insulator or conductor)/semiconductor structure, and their detailed working conditions. The photocurrent at 0 V vs RHE is simplified as  $J_{ph,ca}$  ( $\text{mA cm}^{-2}$ ), the operation time Stability (h), the initial photocurrent during stability measurements  $J_{in}$  ( $\text{mA cm}^{-2}$ ), and the degradation rate  $J_{de}/J_{in}$  (%). The Remark grid is used to illustrate the testing light source and the potentials during stability measurements.

| Year | Light absorber                           | Middle layer                   | Surface materials              | pH   | $J_{ph,ca}$ | Stability | $J_{in}$ | $J_{de}/J_{in}$ | Remark                                                     | Ref. |
|------|------------------------------------------|--------------------------------|--------------------------------|------|-------------|-----------|----------|-----------------|------------------------------------------------------------|------|
| 2018 | Black p-Si                               | Black TiO <sub>2</sub>         | Pd nanoparticle                | 14   | -8.3        | 100       | -10      | 0               | 100 mW cm <sup>-2</sup> ,<br>-0.012 V vs RHE               | 17   |
| 2018 | n <sup>+</sup> p-Si microwire            | SiO <sub>2</sub>               | Ni-Mo nanoparticle             | 1    | -34         | 72        | -34      | 0               | 100 mW cm <sup>-2</sup> ,<br>0 V vs RHE                    | 41   |
| 2013 | a-Si                                     | TiO <sub>2</sub>               | Ni-Mo alloy                    | 4    | -11.6       | 12        | -10.8    | 5               | 100 mW cm <sup>-2</sup> ,<br>0 V vs RHE                    | 72   |
| 2015 | n <sup>+</sup> p-Si                      | TiO <sub>2</sub>               | Pt                             | 0    | -19.34      | 48        | -0.39    | 0               | 100 mW cm <sup>-2</sup> ,<br>no applied bias               | 81   |
| 2018 | 1D Sb <sub>2</sub> Se <sub>3</sub>       | TiO <sub>2</sub>               | Pt                             | 0.5  | -12.5       | 4.5       | -7.8     | 87              | 100 mW cm <sup>-2</sup> ,<br>0 V vs RHE                    | 210  |
| 2013 | p-Si nanowire                            | TiO <sub>2</sub>               | Pt                             | 0    | -21         | 1         | -26      | 2               | 100 mW cm <sup>-2</sup> ,<br>-1.67 V vs RHE                | 211  |
| 2018 | Sb <sub>2</sub> Se <sub>3</sub>          | TiO <sub>2</sub>               | a-MoS <sub>x</sub>             | 0    | -4.8        | 1         | -11      | 0               | 100 mW cm <sup>-2</sup> ,<br>-0.2 V vs RHE                 | 212  |
| 2018 | p-Si                                     | TiO <sub>2</sub>               | 3D MoS <sub>2</sub> layer      | 0    | -27.5       | 108       | -27.5    | 3               | 100 mW cm <sup>-2</sup> ,<br>0 V vs RHE                    | 213  |
| 2016 | Cu(In,Ga)(Se,S) <sub>2</sub> ,<br>(CIGS) | ZnS                            | Pt nanoparticle                | 0.91 | -16         | 10        | -24      | 67              | 100 mW cm <sup>-2</sup> ,<br>-0.5 V vs RHE                 | 214  |
| 2018 | Cu <sub>2</sub> O                        | TiO <sub>2-x</sub>             | Nafion                         | 6.4  | -1.2        | 2         | -1.2     | 30              | 100 mW cm <sup>-2</sup> ,<br>0 V vs RHE                    | 215  |
| 2018 | p-Si                                     | TiO <sub>2</sub>               | Pt nanoparticle                | 0    | 0           | 5         | -25      | 0               | 100 mW cm <sup>-2</sup> ,<br>-0.9 V vs SCE                 | 216  |
| 2016 | InP nanowire                             | TiO <sub>2</sub>               | Pt nanoparticle                | 0    | -15.2       | 10        | -10      | 20              | 100 mW cm <sup>-2</sup> ,<br>not shown                     | 217  |
| 2018 | p-Si                                     | WS <sub>2</sub>                | Au                             | 0    |             | 0.833     | -0.4     | 0               | 300 W Xe lamp,<br>-1 V vs Ag/AgCl                          | 218  |
| 2012 | n <sup>+</sup> p-Si                      | TiO <sub>x</sub>               | MoS <sub>x</sub>               | 0    | -16.2       | 1         | -16.2    | 4               | 38.6 mW cm <sup>-2</sup> ,<br>> 635 nm light<br>0 V vs RHE | 219  |
| 2015 | a-Si                                     | SiO <sub>x</sub>               | Ni-Mo                          | 4.5  | -6          | 25        | -6       | 0               | 100 mW cm <sup>-2</sup> ,<br>0 V vs RHE                    | 220  |
| 2014 | p-Si                                     | Al <sub>2</sub> O <sub>3</sub> | Pt                             | 6    | 0           | 12        | -28      | 0               | 100 mW cm <sup>-2</sup> ,<br>-0.9 V vs RHE                 | 221  |
| 2013 | n <sup>+</sup> p-Si                      | Mo                             | MoS <sub>2</sub>               | 0    | -12         | 120       | -8       | 0               | 1 sun red light,<br>not shown                              | 222  |
| 2015 | p-Si                                     | Ti                             | Ni                             | 14   | -20         | 12        | -10      | 75              | 225 mW cm <sup>-2</sup> ,<br>-0.8 V vs Ag/AgCl             | 223  |
| 2018 | Cu <sub>2</sub> O                        | CuO                            | Ni <sub>x</sub> P <sub>y</sub> | 7    | -3.19       | 0.111     | -1.45    | 7               | 100 mW cm <sup>-2</sup> ,<br>0.05 V vs RHE                 | 224  |

|      |                                                             |                                        |                        |      |       |      |       |    |                                                        |     |
|------|-------------------------------------------------------------|----------------------------------------|------------------------|------|-------|------|-------|----|--------------------------------------------------------|-----|
| 2016 | p-Si                                                        | TiO <sub>2</sub>                       | Pt                     | 14   | -17.5 | 24   | -17.5 | 4  | 38.6 mW cm <sup>-2</sup> ,<br>red light,<br>0 V vs RHE | 225 |
| 2012 | Nanotextured p-InP                                          | TiO <sub>2</sub>                       | Ru                     | 0.51 | -37   | 4    | -36   | 3  | 100 mW cm <sup>-2</sup> ,<br>0.23 V vs NHE             | 226 |
| 2013 | Si nanowire                                                 | SiO <sub>2</sub>                       | Pt nanoparticle        | 1    | -9.1  | 5    | -9.1  | 0  | 100 mW cm <sup>-2</sup> ,<br>0 V vs RHE                | 227 |
| 2016 | CuSbS <sub>2</sub>                                          | CdS                                    | Pt                     | 6.5  | -4.2  | 1    | -4.2  | 17 | 100 mW cm <sup>-2</sup> ,<br>0 V vs RHE                | 228 |
| 2015 | p-Cu <sub>2</sub> O nanowire                                | Graphene                               | Au-Cu nanoalloy        | 5    | -4.5  | 30   | -4.5  | 8  | 100 mW cm <sup>-2</sup> ,<br>0 V vs RHE                | 229 |
| 2018 | n <sup>+</sup> p-Si                                         | TiO <sub>2</sub>                       | Pt                     | 7    | -7.5  |      |       |    | 100 mW cm <sup>-2</sup>                                | 230 |
| 2019 | n <sup>+</sup> p-Si                                         | TiN                                    | Cubic-NiP <sub>2</sub> | 0    | -18   | 125  | -18   | 8  | 100 mW cm <sup>-2</sup> ,<br>0 V vs RHE                | 231 |
| 2019 | (CuInS <sub>2</sub> ) <sub>0.81</sub> (ZnS) <sub>0.19</sub> | CdS                                    | Pt                     | 7    | -16.7 | 1    | -16.7 | 28 | 100 mW cm <sup>-2</sup> ,<br>0 V vs RHE                | 232 |
| 2019 | p-Si nanowire                                               | α-Fe <sub>2</sub> O <sub>3</sub> layer | C layer                | 7    | 0     | 2    | -27   | 11 | 100 mW cm <sup>-2</sup> ,<br>-1.9 V vs RHE             | 233 |
| 2019 | Pyramid n <sup>+</sup> p-Si                                 | Amorphous Ti layer                     | Ni layer               | 14   | -38.7 | 8    | -10   | 7  | 100 mW cm <sup>-2</sup> ,<br>0.375 V vs RHE            | 234 |
| 2019 | CuInS <sub>2</sub> nanosheet                                | SnS <sub>2</sub>                       | C <sub>60</sub>        | 7    | 0     | 3    | -4.51 | 0  | 100 mW cm <sup>-2</sup> ,<br>-0.45 V vs RHE            | 235 |
| 2019 | Amorphous Si                                                | TiO <sub>2</sub>                       | Au                     | 6.8  | -3.6  | 10.5 | -4.85 | 0  | 100 mW cm <sup>-2</sup> ,<br>-0.1 V vs RHE             | 236 |
| 2019 | p-Si                                                        | SiO <sub>x</sub>                       | Ag-Pt                  | 0    | -28   | 24   | -32.5 | 18 | 100 mW cm <sup>-2</sup> ,<br>-0.2 V vs RHE             | 237 |
| 2019 | n <sup>+</sup> np <sup>+</sup> -Si                          | Ni                                     | Ni-Mo                  | 13.6 | -36.3 | 105  | -7.97 | 0  | 100 mW cm <sup>-2</sup> ,<br>no applied bias           | 238 |

Table S8. Reported photoelectrochemical (PEC) performances of the photoanodes with conductor/semiconductor (insulator or conductor)/semiconductor structure, and their detailed working conditions. The photocurrent at 1.23 V vs RHE is simplified as  $J_{ph,an}$  ( $\text{mA cm}^{-2}$ ), the operation time Stability (h), the initial photocurrent during stability measurements  $J_{in}$  ( $\text{mA cm}^{-2}$ ), and the degradation rate  $J_{de}/J_{in}$  (%). The Remark grid is used to illustrate the testing light source and the potentials during stability measurements.

| Year | Light absorber                     | Middle layer                     | Surface materials                             | pH          | $J_{ph,an}$  | Stability | $J_{in}$   | $J_{de}/J_{in}$ | Remark                                                        | Ref. |
|------|------------------------------------|----------------------------------|-----------------------------------------------|-------------|--------------|-----------|------------|-----------------|---------------------------------------------------------------|------|
| 2017 | n-Si                               | ZrO <sub>2</sub>                 | Pt                                            | 14          | 25           | 13.3      | 25         | 10              | 100 mW cm <sup>-2</sup> ,<br>from 0.4 to -0.2<br>V vs Ag/AgCl | 240  |
| 2017 | p <sup>+</sup> n-Si                | SiO <sub>2</sub>                 | Ni-Fe inverse opal                            | 14          | 31.2         | 10.4      | 32.5       | 9               | 100 mW cm <sup>-2</sup> ,<br>1.5 V vs RHE                     | 241  |
| 2015 | n-Si                               | P(VDF-TrFE)                      | Ni                                            | 14          | 12.4         |           |            |                 | 100 mW cm <sup>-2</sup> ,                                     | 242  |
| 2017 | n-Si                               | SiO <sub>x</sub>                 | Ni nanoparticle                               | 14          | 3.5          | 40        | 30         | 2               | 100 mW cm <sup>-2</sup> ,<br>1 V vs SCE                       | 243  |
| 2018 | n-Si                               | Porous SiO <sub>2</sub>          | Ni                                            | 14          | 8            | 24        | 9          | 33              | 100 mW cm <sup>-2</sup> ,<br>not shown                        | 244  |
| 2018 | n-Si                               | TiO <sub>2</sub>                 | NiAu                                          | 14          | 18.8         | 20        | 10.8       | 7               | 100 mW cm <sup>-2</sup> ,<br>not shown                        | 245  |
| 2018 | n-Si                               | ZrO <sub>2</sub>                 | NiFe nanoparticle                             | 14          | 34.4         | 13.33     | 34.4       | 5               | 100 mW cm <sup>-2</sup> ,<br>from 0.4 to -0.2<br>V vs Ag/AgCl | 246  |
| 2017 | n-Si                               | TiO <sub>2</sub>                 | Ni <sub>x</sub> Fe <sub>(1-x)</sub> nanoflake | 14          | 21.5         | 20        | 10         | 28              | 100 mW cm <sup>-2</sup> ,<br>1.16 V vs RHE                    | 247  |
| 2017 | Si                                 | TiO <sub>2</sub>                 | Ni                                            | 14          | 11           | 24        | 11         | 27              | 100 mW cm <sup>-2</sup> ,<br>1.23 V vs RHE                    | 248  |
| 2016 | p <sup>+</sup> n-Si                | Fluorinated graphene             | Pt                                            | 0           | 25.2         | 28        | 31.25      | 5               | 100 mW cm <sup>-2</sup> ,<br>0 V vs solution                  | 249  |
| 2017 | p <sup>+</sup> n-Si                | SiO <sub>x</sub>                 | NiFe                                          | 13.7<br>9.5 | 30.7<br>12.1 | 14<br>100 | 28.5<br>30 | 25<br>0         | 100 mW cm <sup>-2</sup> ,<br>1.85 V vs RHE,<br>1.8 V vs RHE   | 250  |
| 2015 | n-Si<br>n-InP                      | NiCo <sub>2</sub> O <sub>4</sub> | NiFe nanoparticle                             | 14          | 26<br>0      | 72<br>4   | 31<br>17   | 6<br>20         | 100 mW cm <sup>-2</sup> ,<br>1.4 V vs RHE,<br>1.624 V vs RHE  | 251  |
| 2015 | n-Si                               | TiO <sub>2</sub>                 | Ni                                            | 14          | 2            | 60        | 35         | 14              | 100 mW cm <sup>-2</sup> ,<br>1.85 V vs RHE                    | 252  |
| 2018 | n-Si microwire                     | SiO <sub>x</sub>                 | Ni nanoparticle                               | 14          | 4.5          | 6         | 10         | 10              | 100 mW cm <sup>-2</sup> ,<br>not shown                        | 253  |
| 2019 | p <sup>+</sup> pn <sup>+</sup> -Si | Ni                               | Ni-Mo                                         | 13.6        | 34.5         | 105       | 7.97       | 0               | 100 mW cm <sup>-2</sup> ,<br>no applied bias                  | 238  |

Table S9. Reported photoelectrochemical (PEC) performances of the photocathodes with semiconductor/semiconductor (insulator or conductor)/semiconductor structure, and their detailed working conditions. The photocurrent at 0 V vs RHE is simplified as  $J_{ph,ca}$  ( $\text{mA cm}^{-2}$ ), the operation time Stability (h), the initial photocurrent during stability measurements  $J_{in}$  ( $\text{mA cm}^{-2}$ ), and the degradation rate  $J_{de}/J_{in}$  (%). The Remark grid is used to illustrate the testing light source and the potentials during stability measurements.

| Year | Light absorber                                                                                     | Middle layer                  | Surface materials               | pH | $J_{ph,ca}$ | Stability | $J_{in}$ | $J_{de}/J_{in}$ | Remark                                                    | Ref. |
|------|----------------------------------------------------------------------------------------------------|-------------------------------|---------------------------------|----|-------------|-----------|----------|-----------------|-----------------------------------------------------------|------|
| 2017 | p-Si                                                                                               | TiO <sub>2</sub>              | NiFe LDH                        | 14 | -7          | 24        | -10      | 9               | 100 mW cm <sup>-2</sup> ,<br>not shown                    | 239  |
| 2018 | n <sup>+</sup> n <sup>+</sup> p-Si                                                                 | Pt nanoparticle               | TiO <sub>2</sub>                | 0  | -35.1       | 168       | -20      | 12              | 100 mW cm <sup>-2</sup> ,<br>0.4 V vs RHE                 | 254  |
| 2018 | p-Si                                                                                               | SiO <sub>2</sub>              | NiO <sub>x</sub>                | 14 | -30.6       | 8         | -10      | 50              | 100 mW cm <sup>-2</sup> ,<br>not shown                    | 255  |
| 2018 | a-SiC:H                                                                                            | n-SiO <sub>x</sub> :H         | TiO <sub>2</sub>                | 4  | -5.5        | 1         | -5.5     | 18              | Not shown,<br>0 V vs RHE                                  | 256  |
| 2015 | p-Si nanowire                                                                                      | Pt nanoparticle               | TiO <sub>2</sub>                | 0  | -7.5        | 2         | -27      | 0               | 100 mW cm <sup>-2</sup> ,<br>-0.5 V vs RHE                | 257  |
| 2015 | a-Si                                                                                               | TiO <sub>2</sub>              | Mo <sub>2</sub> C               | 14 | -11.2       | 1         | -10.5    | 14              | 100 mW cm <sup>-2</sup> ,<br>0 V vs RHE                   | 258  |
| 2018 | p-Si                                                                                               | Inverse opal TiO <sub>2</sub> | Hydrogenases                    | 6  | -0.7        | 5         | -0.7     | 86              | 100 mW cm <sup>-2</sup> ,<br>> 420 nm light<br>0 V vs RHE | 259  |
| 2018 | (ZnSe) <sub>0.85</sub> (CuIn <sub>0.7</sub><br>Ga <sub>0.3</sub> Se <sub>2</sub> ) <sub>0.15</sub> | CdS                           | Ru <sub>2</sub> O               | 13 | -9.1        | 17        | -2.9     | 3               | 100 mW cm <sup>-2</sup> ,<br>0.6 V vs RHE                 | 260  |
| 2019 | p-Si                                                                                               | SiO <sub>2</sub>              | Porous NiO <sub>x</sub>         | 14 | -21         | 1         | -10      | 0               | 100 mW cm <sup>-2</sup> ,<br>0.6 V vs RHE                 | 261  |
| 2019 | n <sup>+</sup> p-Si                                                                                | Ti                            | NiS <sub>x</sub> O <sub>y</sub> | 14 | -26         | 6         | -10      | 0               | 100 mW cm <sup>-2</sup> ,<br>0.05 V vs RHE                | 262  |
| 2019 | Cu <sub>2</sub> O                                                                                  | CuO                           | Ni(OH) <sub>2</sub>             | 6  | -7.25       | 24        | -7.25    | 15.7            | 100 mW cm <sup>-2</sup> ,<br>0 V vs RHE                   | 263  |

Table S10. Reported photoelectrochemical (PEC) performances of the photoanodes with semiconductor/semiconductor (insulator or conductor)/semiconductor structure, and their detailed working conditions. The photocurrent at 1.23 V vs RHE is simplified as  $J_{ph,an}$  ( $\text{mA cm}^{-2}$ ), the operation time Stability (h), the initial photocurrent during stability measurements  $J_{in}$  ( $\text{mA cm}^{-2}$ ), and the degradation rate  $J_{de}/J_{in}$  (%). The Remark grid is used to illustrate the testing light source and the potentials during stability measurements.

| Year | Light absorber                   | Middle layer            | Surface materials                           | pH        | $J_{ph,an}$ | Stability | $J_{in}$ | $J_{de}/J_{in}$ | Remark                                                         | Ref. |
|------|----------------------------------|-------------------------|---------------------------------------------|-----------|-------------|-----------|----------|-----------------|----------------------------------------------------------------|------|
| 2011 | Triple junction, amorphous Si    | ITO layer               | Cobalt   borate                             | 9.2       | 4.4         | 0.2       | 1.1      | 0               | 100 $\text{mW cm}^{-2}$ , -0.26 V vs RHE                       | 12   |
| 2018 | Black n-Si                       | Ni                      | Nb-doped $\text{NiO}_x$                     | 14        | 5.1         | 24        | 15.3     | 0               | 100 $\text{mW cm}^{-2}$ , 1.43 V vs RHE                        | 14   |
| 2014 | p <sup>+</sup> n-Si              | Ni                      | Fe-treated NiO                              | 14        | 17.3        | 300       | 18.5     | 20              | 100 $\text{mW cm}^{-2}$ , > 635 nm light 1.3 V vs RHE          | 40   |
| 2015 | n-Si                             | $\text{CoO}_x$          | $\text{NiO}_x$                              | 14        | 28          | 1700      | 30       | 0               | 100 $\text{mW cm}^{-2}$ , 1.63 V vs RHE                        | 42   |
| 2015 | p <sup>+</sup> n-Si              | FTO                     | $\text{WO}_3$                               | 0         | 1.24        | 20        | 1.24     | 0               | 100 $\text{mW cm}^{-2}$ , no applied bias                      | 81   |
| 2017 | n-Si                             | ZnO                     | $\text{SiO}_2$                              | 7         | 0.28        | 1         | 0.21     | 0               | 100 $\text{mW cm}^{-2}$ , 0.3 V vs Ag/AgCl                     | 85   |
| 2016 | p <sup>+</sup> n-Si              | $\text{SiO}_2$          | $\text{CoO}_x$                              | 14        | 30.8        | 72        | 10       | 0               | 100 $\text{mW cm}^{-2}$ , not shown                            | 264  |
| 2016 | Porous n-Si                      | $\text{TiO}_2$          | ZnO                                         | 7         | 8.2         | 50        | 11.5     | 22              | 100 $\text{mW cm}^{-2}$ , not shown                            | 265  |
| 2017 | $\mu\text{c-Si:H}$               | ITO                     | $\text{NiO}_x$                              | 14        | 7.64        | 1.33      | 7.5      | 1               | 100 $\text{mW cm}^{-2}$ , 0.62 V vs Ag/AgCl                    | 266  |
| 2017 | Black Si                         | $\text{TiO}_2$          | $\text{Co(OH)}_2$                           | 14        | 7.8         | 4         | 31       | 17              | 100 $\text{mW cm}^{-2}$ , 1.65 V vs RHE                        | 267  |
| 2013 | n-Si                             | Ni                      | $\text{NiO}_x$                              | 14<br>9.5 | 12.5<br>0   | 12<br>80  | 10<br>10 | 0<br>0          | 225 $\text{mW cm}^{-2}$ , 0.15-0.3 V vs RHE, 0.6-0.65 V vs RHE | 268  |
| 2017 | Si                               | $\text{TiO}_2$ nanorod  | MOFs-derived Porous $\text{Co}_3\text{O}_4$ | 14        | 2.71        | 2         | 2.68     | 0               | 100 $\text{mW cm}^{-2}$ , 1.2 V vs RHE                         | 269  |
| 2016 | n-Si                             | $\text{Al}_2\text{O}_3$ | $\text{NiO}_x$                              | 14        | 3.36        | 20        | 9.3      | 0               | 100 $\text{mW cm}^{-2}$ , 1.33 V vs RHE                        | 270  |
| 2014 | p <sup>+</sup> n-Si              | Ir                      | $\text{IrO}_x$                              | 0         | 21          | 18        | 21       | 40              | 38.6 $\text{mW cm}^{-2}$ , 1.23 V vs RHE                       | 271  |
| 2016 | $\text{Ta}_5\text{N}_3$ nanotube | $\text{TaO}_x$          | $\text{Co(OH)}_x$                           | 14        | 6.3         | 2         | 7        | 86              | 100 $\text{mW cm}^{-2}$ , 0.23 V vs Ag/AgCl                    | 272  |
| 2019 | p <sup>+</sup> n-Si              | Ni                      | Ni-O                                        | 13.6      | 39.7        | 100       | 10       | 0               | 100 $\text{mW cm}^{-2}$ , 1.02 V vs RHE                        | 273  |

Table S11. Reported photoelectrochemical (PEC) performances of the photocathodes with multi-layered ( $n > 3$ ) structure, and their detailed working conditions. The photocurrent at 0 V vs RHE is simplified as  $J_{ph,ca}$  ( $\text{mA cm}^{-2}$ ), the operation time Stability (h), the initial photocurrent during stability measurements  $J_{in}$  ( $\text{mA cm}^{-2}$ ), and the degradation rate  $J_{de}/J_{in}$  (%). The Remark grid is used to illustrate the testing light source and the potentials during stability measurements.

| Year | Light absorber                                                                                  | Middle layers                                           | Surface materials       | pH   | $J_{ph,ca}$ | Stability | $J_{in}$ | $J_{de}/J_{in}$ | Remark                                                     | Ref. |
|------|-------------------------------------------------------------------------------------------------|---------------------------------------------------------|-------------------------|------|-------------|-----------|----------|-----------------|------------------------------------------------------------|------|
| 2017 | p-Si                                                                                            | SiO <sub>2</sub> /Ti                                    | Pt                      | 0    | -4.5        | 40        | -8       | 7               | 100 mW cm <sup>-2</sup> ,<br>not shown                     | 184  |
| 2017 | Cu <sub>2</sub> O                                                                               | AZO/TiO <sub>2</sub>                                    | RuO <sub>x</sub>        | 5    | -5.25       | 5         | -3.6     | 0               | 100 mW cm <sup>-2</sup> ,<br>0 V vs RHE                    | 274  |
| 2017 | GaInP <sub>2</sub>                                                                              | TiO <sub>2</sub> /MoO <sub>x</sub> /                    | Graded MoS <sub>x</sub> | 0.3  | -11         | 20        | -11.2    | 18              | 100 mW cm <sup>-2</sup> ,<br>0 V vs RHE                    | 275  |
| 2017 | Cu <sub>2</sub> O                                                                               | AZO/TiO <sub>2</sub>                                    | Pt                      | 4.15 | -2.74       | 2         | -2.74    | 85              | 100 mW cm <sup>-2</sup> ,<br>0 V vs RHE                    | 276  |
| 2016 | (ZnSe) <sub>0.85</sub> (CuIn <sub>0.7</sub> Ga <sub>0.3</sub> Se <sub>2</sub> ) <sub>0.15</sub> | CdS/Ti/Mo                                               | Pt                      | 7    | -7.1        | 0.5       | -0.9     | 20              | 100 mW cm <sup>-2</sup> ,<br>no applied bias               | 277  |
| 2017 | (ZnSe) <sub>0.85</sub> (CuIn <sub>0.7</sub> Ga <sub>0.3</sub> Se <sub>2</sub> ) <sub>0.15</sub> | CdS/ZnS                                                 | Pt                      | 7    | -4.3        | 1         | -4.3     | 7               | 100 mW cm <sup>-2</sup> ,<br>0 V vs RHE                    | 278  |
| 2018 | CH <sub>3</sub> NH <sub>3</sub> PbI <sub>3</sub>                                                | PCBM/Ag/Ti                                              | Pt nanoparticle         | 0    | -18         | 12        | -17.5    | 36              | 100 mW cm <sup>-2</sup> ,<br>0 V vs RHE                    | 279  |
|      |                                                                                                 |                                                         |                         | 7    |             |           | -16      | 25              |                                                            |      |
|      |                                                                                                 |                                                         |                         | 14   |             |           | -17.5    | 36              |                                                            |      |
| 2014 | p-Si                                                                                            | SrTiO <sub>3</sub> /Ti                                  | Pt                      | 0    | -23.4       | 35        | -31      | 3               | 100 mW cm <sup>-2</sup> ,<br>0.6 V vs Ag/AgCl              | 280  |
| 2017 | p-Si                                                                                            | Ti/TiO <sub>x</sub> /TiO <sub>2</sub>                   | Pt                      | 0    | -20.5       | 300       | -17.2    | 9               | 100 mW cm <sup>-2</sup> ,<br>0.3 V vs RHE                  | 281  |
| 2016 | Cu <sub>2</sub> O                                                                               | AZO/TiO <sub>2</sub>                                    | Re(bipy)                | 7.8  | 0           | 0.25      | -2.5     | 50              | 100 mW cm <sup>-2</sup> ,<br>-1.9 V vs Fc <sup>+</sup> /Fc | 282  |
| 2014 | n <sup>+</sup> p-Si                                                                             | Mo <sub>x</sub> Si/Mo                                   | MoS <sub>2</sub>        | 0    | -17         | 100       | -17      | 6               | 100 mW cm <sup>-2</sup> ,<br>0 V vs RHE                    | 283  |
| 2018 | p-SnS nanoplatelet                                                                              | CdS/TiO <sub>2</sub>                                    | Pt                      | 0    | -3          | 1.67      | -3       | 0               | 80 mW cm <sup>-2</sup> ,<br>0 V vs RHE                     | 284  |
| 2017 | GaInAs                                                                                          | GaInP/AlInP                                             | GaInP                   | 0    | -13.2       |           |          |                 | 100 mW cm <sup>-2</sup>                                    | 285  |
| 2015 | GaInP                                                                                           | Al <sub>x</sub> In <sub>1-x</sub> P/AlInPO <sub>x</sub> | Rh                      | 0    | -14.5       | 40        | -12.3    | 50              | 100 mW cm <sup>-2</sup> ,<br>0.6 V vs RHE                  | 286  |
| 2016 | a-SiC                                                                                           | nc-SiO <sub>x</sub> /TiO <sub>2</sub> /Ni               | Ni-Mo                   | 14   | -14         | 1         | -13.6    | 61              | 100 mW cm <sup>-2</sup> ,<br>0 V vs RHE                    | 287  |
| 2016 | p-Si                                                                                            | SiO <sub>2</sub> /Pt                                    | SiO <sub>x</sub>        | 0    | -27.8       | 12        | -10      | 0               | 100 mW cm <sup>-2</sup> ,<br>0.05 V vs RHE                 | 288  |
| 2017 | p-Si                                                                                            | SiO <sub>2</sub> /SiF <sub>x</sub> /Ti/TiO <sub>2</sub> | Au                      | 0    | -28         | 1         | -32.5    | 0               | Not shown,<br>-0.8 V vs NHE                                | 289  |
| 2014 | Porous p-CuInS <sub>2</sub>                                                                     | CdS/TiO <sub>2</sub>                                    | Pt                      | 10   | -13         | 1         | -13      | 0               | 100 mW cm <sup>-2</sup> ,<br>0 V vs RHE                    | 290  |
| 2013 | p-Si                                                                                            | SiO <sub>x</sub> /Ti                                    | Pt                      | 0    | -18         | 2.5       | -8.13    | 0               | 100 mW cm <sup>-2</sup> ,<br>-0.04 V vs RHE                | 291  |
| 2015 | n <sup>+</sup> p-Si                                                                             | n-GaN/ n <sup>++</sup> -GaN                             | p-InGaN                 | 0    | -31.2       | 3         | -20.5    | 0               | 130 mW cm <sup>-2</sup> ,                                  | 292  |

|      |                                                  |                                                        |                                |           |       |       |       |    |                                                             |     |
|------|--------------------------------------------------|--------------------------------------------------------|--------------------------------|-----------|-------|-------|-------|----|-------------------------------------------------------------|-----|
|      |                                                  | InGaN/p <sup>++</sup> -GaN                             |                                |           |       |       |       |    | -0.006 V vs NHE                                             |     |
| 2011 | Cu <sub>2</sub> O                                | AZO/TiO <sub>2</sub>                                   | Pt                             | 4.9       | -7.6  | 1.33  | -0.8  | 87 | 100 mW cm <sup>-2</sup> ,<br>not shown                      | 293 |
| 2017 | n <sup>+</sup> p-Si                              | SiO <sub>2</sub> /Mo <sub>x</sub> Si/Mo <sub>x</sub> O | MoS <sub>2</sub>               | 0         | -13   | 1488  | -13   | 31 | 100 mW cm <sup>-2</sup> ,<br>0 V vs RHE                     | 294 |
| 2014 | Cu <sub>2</sub> O                                | n-AZO/TiO <sub>2</sub>                                 | MoS <sub>2+x</sub>             | 1         | -5.7  | 10    | -5.7  | 0  | 100 mW cm <sup>-2</sup> ,<br>0 V vs RHE                     | 295 |
| 2017 | Porous Si                                        | Graphene/Ni <sub>3</sub> Se <sub>2</sub>               | Co <sub>9</sub> S <sub>8</sub> | 14        | 0     | 10    | -10   | 0  | 100 mW cm <sup>-2</sup> ,<br>not shown                      | 296 |
| 2016 | CH <sub>3</sub> NH <sub>3</sub> PbI <sub>3</sub> | PCBM/PEIE-Ag                                           | Pt                             | 8.5       | -7.7  | 2     | -7.7  | 87 | 100 mW cm <sup>-2</sup> ,<br>0 V vs RHE                     | 297 |
| 2018 | p-Cu <sub>2</sub> O nanorod                      | p-Cu <sub>2</sub> O/n-Cu <sub>2</sub> O                | Pt                             | 7         | -10   | 0.167 | -10   | 50 | 100 mW cm <sup>-2</sup> ,<br>0 V vs RHE                     | 298 |
| 2015 | Cu <sub>2</sub> O                                | Ga <sub>2</sub> O <sub>3</sub> /TiO <sub>2</sub>       | Pt                             | 4.26      | -2.95 | 2     | -2.95 | 0  | 100 mW cm <sup>-2</sup> ,<br>0 V vs RHE                     | 299 |
| 2018 | n <sup>+</sup> p-Si                              | GaN/TiO <sub>2</sub>                                   | Pt                             | 7.5       | -68   | 10    | -21   | 17 | 800 mW cm <sup>-2</sup> ,<br>0.27 V vs RHE                  | 300 |
| 2015 | Cu <sub>2</sub> O                                | AZO/TiO <sub>2</sub> /MoS <sub>2</sub>                 | NiMo                           | 14        | -6.3  | 10    | -6.3  | 76 | 100 mW cm <sup>-2</sup> ,<br>0 V vs RHE                     | 301 |
| 2017 | p-GaAs                                           | n-GaAs/n-AlGaAs/<br>n <sup>+</sup> -GaAs/Pt/Ti/Pt      | Au                             | 0         | -23.1 | 192   | -23.1 | 9  | 100 mW cm <sup>-2</sup> ,<br>0 V vs RHE                     | 302 |
| 2018 | Cu(In,Ga)Se <sub>2</sub>                         | CdS/rGO                                                | Pt                             | 6.8       | -22.2 | 7     | -22.4 | 0  | 100 mW cm <sup>-2</sup> ,<br>0 V vs RHE                     | 303 |
| 2017 | Se-annealed Sb <sub>2</sub> Se <sub>3</sub>      | CdS/TiO <sub>2</sub>                                   | Pt                             | 6.5       | -8.6  | 10    | -8.6  | 16 | 100 mW cm <sup>-2</sup> ,<br>0 V vs RHE                     | 304 |
| 2014 | n <sup>+</sup> p-Si                              | Ti/FTO/TiO <sub>2</sub>                                | Ir                             | 14        | -39   | 48    | -31.2 | 0  | Not shown,<br>0.3 V vs RHE                                  | 305 |
| 2018 | Cu <sub>2</sub> S                                | CdS/TiO <sub>2</sub>                                   | RuO <sub>x</sub>               | 5         | -5.95 | 3.33  | -3.55 | 15 | 100 mW cm <sup>-2</sup> ,<br>0 V vs RHE                     | 306 |
| 2018 | c-Si                                             | TaO <sub>x</sub> /Ti                                   | Pt                             | 0         | -37.1 | 2     | -37.1 | 0  | 100 mW cm <sup>-2</sup> ,<br>0 V vs RHE                     | 307 |
| 2018 | a-Si                                             | ZnOB/Ti                                                | CoS                            | 7<br>13.6 | -6.34 | 10    | -6.34 | 5  | 100 mW cm <sup>-2</sup> ,<br>0 V vs RHE                     | 308 |
| 2012 | Cu <sub>2</sub> O                                | AZO/TiO <sub>2</sub>                                   | Pt                             | 1         | -3.8  | 10    | -3.8  | 38 | 100 mW cm <sup>-2</sup> ,<br>0 V vs RHE                     | 309 |
| 2013 | n <sup>+</sup> p-Si                              | Ti/TiO <sub>2</sub>                                    | Pt                             | 0         | -23.8 | 72    | -19.8 | 0  | 100 mW cm <sup>-2</sup> ,<br>> 635 nm light<br>0.3 V vs RHE | 310 |
| 2015 | p-GaInP <sub>2</sub>                             | TiO <sub>2</sub> /Cobaloxime                           | TiO <sub>2</sub>               | 13        | -11.5 | 0.333 | -9    | 11 | 100 mW cm <sup>-2</sup> ,<br>0 V vs RHE                     | 311 |
| 2019 | Cu(In, Ga)SSe                                    | CdS/ZnO                                                | CoS                            | 7         | -3.1  |       |       |    | 100 mW cm <sup>-2</sup>                                     | 312 |
| 2019 | CuGaSe                                           | CdS/TiO <sub>2</sub>                                   | MoS <sub>2</sub>               | 0         | -6.5  | 24    | -6.5  | 69 | 100 mW cm <sup>-2</sup> ,<br>0 V vs RHE                     | 313 |



Table S12. Reported photoelectrochemical (PEC) performances of the photoanodes with multi-layered ( $n > 3$ ) structure, and their detailed working conditions. The photocurrent at 1.23 V vs RHE is simplified as  $J_{ph,an}$  ( $\text{mA cm}^{-2}$ ), the operation time Stability (h), the initial photocurrent during stability measurements  $J_{in}$  ( $\text{mA cm}^{-2}$ ), and the degradation rate  $J_{de}/J_{in}$  (%). The Remark grid is used to illustrate the testing light source and the potentials during stability measurements.

| Year | Light absorber                       | Middle layers                                  | Surface materials                                            | pH      | $J_{ph,an}$ | Stability | $J_{in}$ | $J_{de}/J_{in}$ | Remark                                                              | Ref. |
|------|--------------------------------------|------------------------------------------------|--------------------------------------------------------------|---------|-------------|-----------|----------|-----------------|---------------------------------------------------------------------|------|
| 2017 | n-GaAs                               | $\text{Al}_2\text{O}_3/\text{SiO}_2$           | NiFe                                                         | 14      | 5           |           |          |                 | 100 $\text{mW cm}^{-2}$                                             | 184  |
| 2015 | n-Si                                 | $\text{SiO}_x/\text{Co}$                       | CoOOH                                                        | 14<br>9 | 35          | 5<br>120  | 10<br>8  | 100<br>0        | 100 $\text{mW cm}^{-2}$ ,<br>1 V vs Ag/AgCl<br>1.3 V vs Ag/<br>AgCl | 314  |
| 2011 | n-Si                                 | $\text{SiO}_2/\text{TiO}_2$                    | Ir                                                           | 14      | 7           | 24        | 3        | 0               | 100 $\text{mW cm}^{-2}$ ,<br>1.7 V vs NHE                           | 315  |
| 2017 | CdS                                  | $\text{CdTe}/\text{MoO}_x/\text{Ti}$           | $\text{Co}(\text{OH})_x$                                     | 8       | 3.8         | 0.5       | 2.18     | 68              | 100 $\text{mW cm}^{-2}$ ,<br>no applied bias                        | 316  |
| 2017 | Black p <sup>+</sup> n-Si            | $\text{SnO}_2/\text{BiVO}_4$                   | CoPi                                                         | 7       | 2           | 1         | 0.6      | 58              | 100 $\text{mW cm}^{-2}$ ,<br>not shown                              | 317  |
| 2017 | n-Si                                 | $\text{SiO}_x/\text{ITO}$                      | a-NiOOH                                                      | 14      | 27.4        | 30        | 27.4     | 0               | 100 $\text{mW cm}^{-2}$ ,<br>1.23 V vs RHE                          | 318  |
| 2015 | p <sup>+</sup> n-Si                  | $\text{SiO}_2/\text{TiO}_2$                    | Ir                                                           | 0       | 5.1         |           |          |                 | 100 $\text{mW cm}^{-2}$                                             | 319  |
| 2016 | GaAs                                 | $\text{GaInP}/\text{TiO}_2$                    | Ni                                                           | 9.3     | 8.7         | 110       | 8.7      | 0               | 100 $\text{mW cm}^{-2}$ ,<br>-0.016 V vs RHE                        | 320  |
| 2016 | $\text{Ta}_3\text{N}_5$              | $\text{TiO}_2/\text{Ferrhydrite}$              | $\text{Ni}(\text{OH})_x$                                     | 13.6    | 12.1        |           |          |                 | 100 $\text{mW cm}^{-2}$                                             | 321  |
| 2016 | n-Si                                 | $\text{SiO}_2/\text{TiO}_2$                    | Ir                                                           | 0       | 0           | 8         | 3        | 66              | Not shown                                                           | 322  |
| 2018 | n <sup>+</sup> p-Si                  | $\text{SiO}_x/\text{Ni}/\text{NiO}_x$          | NiFe LDH                                                     | 14      | 37          | 68        | 10       | 10              | 225 $\text{mW cm}^{-2}$ ,<br>not shown                              | 323  |
| 2018 | n-Si                                 | $\text{SiO}_2/\text{Al}_2\text{O}_3/\text{Pt}$ | Ni                                                           | 14      | 24          |           |          |                 | 100 $\text{mW cm}^{-2}$                                             | 324  |
| 2015 | $\text{CH}_3\text{NH}_3\text{PbI}_3$ | Spiro-MeOTAD/Au                                | Ni                                                           | 12.8    | 13          | 0.278     | 13       | 84              | 100 $\text{mW cm}^{-2}$ ,<br>not shown                              | 325  |
| 2017 | n-Si                                 | $\text{SiO}_x/\text{Al}_2\text{O}_3/\text{Pt}$ | Ni                                                           | 14      | 19.2        | 200       | 25       | 4               | 100 $\text{mW cm}^{-2}$ ,<br>1.7 V vs RHE                           | 326  |
| 2016 | Si                                   | $\text{SiO}_2/\text{TiO}_2\text{-RuO}_2$       | Ir                                                           | 0       | 12.5        |           |          |                 | 100 $\text{mW cm}^{-2}$                                             | 327  |
| 2016 | n-Si                                 | GO/SWCNT/<br>Graphene                          | Ni                                                           | 14      | 0           | 0.25      | 2.45     | 28              | 100 $\text{mW cm}^{-2}$ ,<br>1.73 V vs RHE                          | 328  |
| 2017 | p <sup>+</sup> n-Si                  | $\text{TiO}_2/\text{C}/\text{CNT}$             | $\text{Ru}^{\text{IV}}(\text{tda})(\text{py-pyr})_2\text{O}$ | 7       | 0.35        | 3.33      | 0.35     | 0               | 100 $\text{mW cm}^{-2}$ ,<br>1.23 V vs RHE                          | 329  |
| 2014 | p <sup>+</sup> n-Si                  | ITO/Au/ITO                                     | $\text{NiO}_x\text{-triton-X}$                               | 13.8    | 3.88        | 0.444     | 1.96     | 5               | 100 $\text{mW cm}^{-2}$ ,<br>From 1 to -0.05 V<br>vs RHE            | 330  |
| 2017 | n-Si                                 | $\text{SiO}_x/\text{Ni}$                       | $\text{Ni}(\text{OH})_2$                                     | 14<br>9 | 13.5        | 300       | 8        | 0               | 100 $\text{mW cm}^{-2}$ ,<br>1.73 V vs RHE                          | 331  |
| 2016 | GaAs                                 | $\text{InGaP}/\text{TiO}_2$                    | Ni                                                           | 13.7    | 0           | 3         | 8        | 0               | 100 $\text{mW cm}^{-2}$ ,<br>no applied bias                        | 332  |
| 2016 | p <sup>+</sup> n-Si                  | $\text{SiO}_2/\text{TiO}_2$                    | Ir                                                           | 14      | 2.9         |           |          |                 | 100 $\text{mW cm}^{-2}$                                             | 333  |

|      |                   |                        |                  |      |      |      |    |   |                                           |     |
|------|-------------------|------------------------|------------------|------|------|------|----|---|-------------------------------------------|-----|
| 2019 | Si heterojunction | ITO/graphdiyne         | NiO <sub>x</sub> | 14   | 5    | 0.11 | 15 | 7 | 100 mW cm <sup>-2</sup> ,<br>1.4 V vs RHE | 334 |
| 2019 | n-Si              | SiO <sub>2</sub> /NiFe | NiFe(OOH)        | 13.6 | 25.4 | 52   | 32 | 0 | 100 mW cm <sup>-2</sup> ,<br>1.5 V vs RHE | 335 |
